# Supplementary material for: Impact of Anatomical Versus Non-anatomical Liver Resection on Short- and Long-Term Outcomes for Patients with Intrahepatic Cholangiocarcinoma
Source: Springer Nature journal article supplement (doi:10.1245/s10434-019-07260-8), 2019-03-06
Supplement: MOESM3 [file 16529990]

**Supplementary Table S3. Multivariate Cox regression analysis of DFS and OS in the whole cohort (n=671)**

| **Variablea** | **DFS** | |  | **OS** | |
| --- | --- | --- | --- | --- | --- |
| HR (95% CI) | *p* value | HR (95% CI) | *p* value |
| **Hepatolithiasis,** Yes vs. No | / | / |  | 1.407 (1.107 – 1.788) | 0.005 |
| **CEA,** μg/L, > 10 vs. ≤ 10 | 1.885 (1.475 – 2.409) | <0.001 |  | 2.204 (1.712 – 2.838) | <0.001 |
| **CA 19-9,** U/L, > 39 vs. ≤ 39 | 1.646 (1.372 – 1.976) | <0.001 |  | 1.694 (1.397 – 2.054) | <0.001 |
| **Tumor diameter,** cm, > 5 vs. ≤ 5 | 1.404 (1.170 – 1.684) | <0.001 |  | 1.368 (1.129 – 1.659) | 0.001 |
| **Tumor number,** Multiple vs. Solitary | 1.561 (1.290 – 1.888) | <0.001 |  | 1.524 (1.247 – 1.861) | <0.001 |
| **Nodal metastasis,** Yes vs. No | 1.696 (1.365 – 2.107) | <0.001 |  | 1.760 (1.405 – 2.206) | <0.001 |
| **Local extrahepatic invasion,**  Yes vs. No | 1.672 (1.207 – 2.316) | 0.002 |  | 1.446 (1.039 – 2.012) | 0.029 |
| **Type of hepatectomy,** NAR vs. AR | 1.429 (1.199 – 1.704) | <0.001 |  | 1.410 (1.171 – 1.698) | <0.001 |

**Abbreviations**:CEA, carcinoembryonic antigen; CA19-9, carbonhydrate antigen 19-9; AR, anatomical resection; NAR, non-anatomical resection; OS, overall survival; HR, hazard ratio; CI, confidence interval.

a: all tumor-related variables were based on histopathological examinations.
